# Supplementary material
Source: Springer Nature journal article supplement (https://www.springermedizin.de/resource/supplementary/13046_2008_105_MOESM2_ESM.pdf/9661636)

# IFN- $\gamma$ secreting T-lymphocytes in PBMC (%)

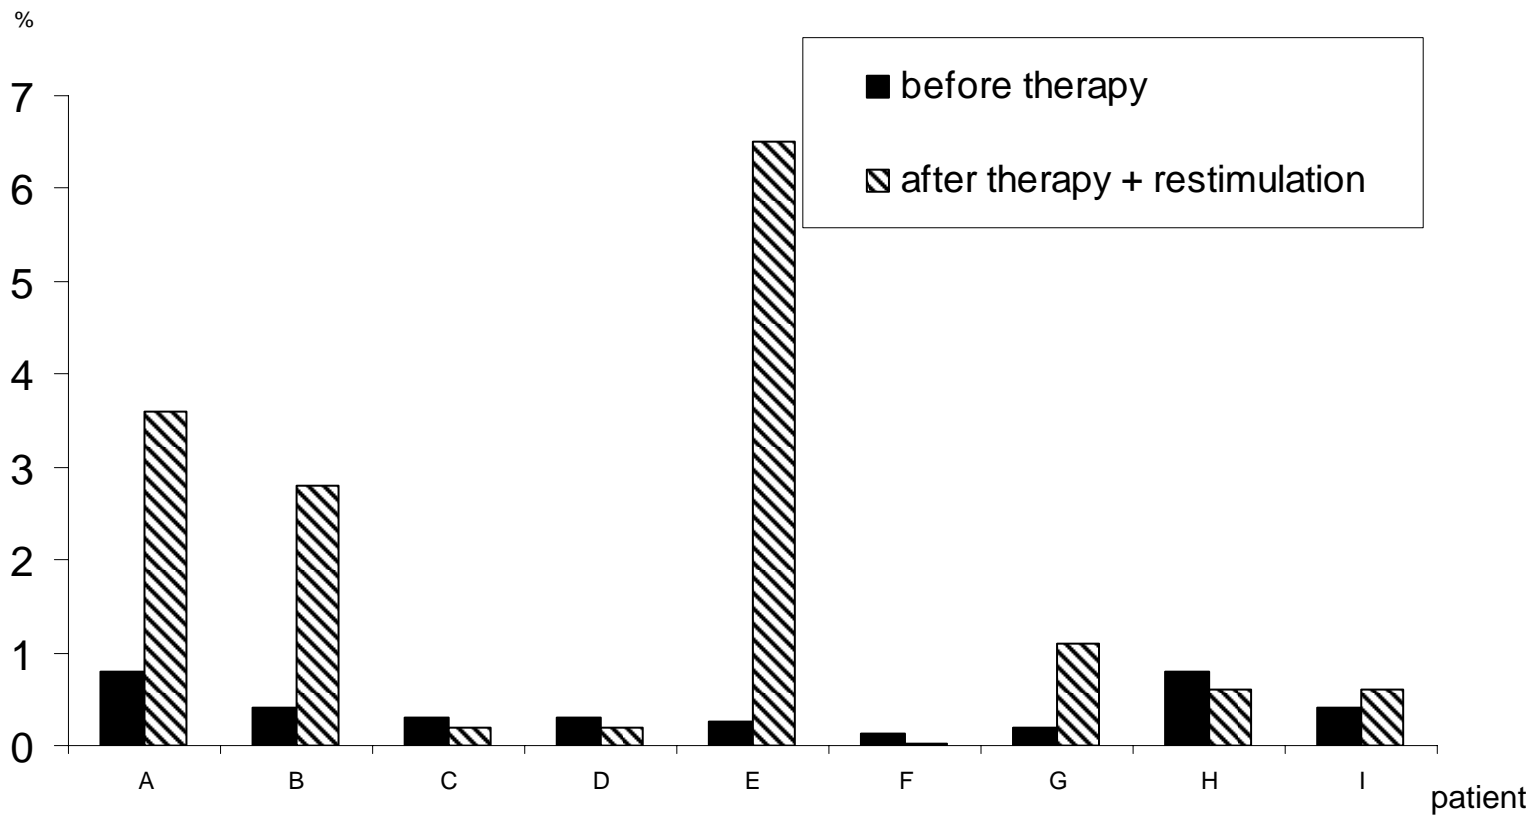

Supplement: MOESM2 [file 9661636]
